# Supplementary material for: Spatial distribution of parrotfishes and groupers in an Okinawan coral reef: size-related associations in relation to habitat characteristics
Source: PeerJ. 2021 Sep 3;9:e12134. doi: 10.7717/peerj.12134 (PMC8420873; doi:10.7717/peerj.12134)
Supplement: Supplemental Information 6 [file peerj-09-12134-s006.xls]

## Sheet: Parrotfishes
	Density (per 100 m x 5m)
	Scarus forsteni	Scarus psittacus	Chlorurus bowersi	Scarus schlegeli	Scarus dimidiatus	Scarus hypselopterus	Scarus spinus	Scarus rivulatus	Chlorurus microrhinos	Chlorurus spilurus	Scarus ghobban	Scarus niger	Scarus forsteni	Scarus psittacus	Chlorurus bowersi	Scarus schlegeli	Scarus dimidiatus	Scarus hypselopterus	Scarus spinus	Scarus rivulatus	Chlorurus microrhinos	Chlorurus spilurus	Scarus ghobban	Scarus niger	Scarus forsteni	Scarus psittacus	Chlorurus bowersi	Scarus schlegeli	Scarus dimidiatus	Scarus hypselopterus	Scarus spinus	Scarus rivulatus	Chlorurus microrhinos	Chlorurus spilurus	Scarus ghobban	Scarus niger	Scarus forsteni	Scarus psittacus	Chlorurus bowersi	Scarus schlegeli	Scarus dimidiatus	Scarus hypselopterus	Scarus spinus	Scarus rivulatus	Chlorurus microrhinos	Chlorurus spilurus	Scarus ghobban	Scarus niger	Scarus forsteni
Site	Size class 1	Size class 1	Size class 1	Size class 1	Size class 1	Size class 1	Size class 1	Size class 1	Size class 1	Size class 1	Size class 1	Size class 1	Size class 2	Size class 2	Size class 2	Size class 2	Size class 2	Size class 2	Size class 2	Size class 2	Size class 2	Size class 2	Size class 2	Size class 2	Size class 3	Size class 3	Size class 3	Size class 3	Size class 3	Size class 3	Size class 3	Size class 3	Size class 3	Size class 3	Size class 3	Size class 3	Size class 4	Size class 4	Size class 4	Size class 4	Size class 4	Size class 4	Size class 4	Size class 4	Size class 4	Size class 4	Size class 4	Size class 4	Size class 5
1	0.14245	0	0.438275	0	0	0.153374	0	0.42735	0	2.1586	0	0.14245	0.42735	0	0.734099	0.14245	0	1.22699	0.295824	0.887473	0.2849	2.23507	0	0.295824	0.745023	0.295824	0	0	0	0.766871	0.997151	1.61065	0	4.16339	0	1.92832	0.14245	0	0	0	0	0	0	0	1.019	0	0	0	0
11	0	0	0	0	0	0	0	0	0	0.134048	0	0	0	0	0	0	0	0	0.126904	0	0	1.55142	0	0.260952	1.68547	0	0	0	0	0	0.507614	0	0	3.25833	0	1.975	0	0	0	0	0	0	0	0	0.126904	0	0	0	0
13	0.280899	0	0.140449	0	0	0	0	0	0	0.556483	0	0.421348	0.561798	0	0	0	0	0	0	0.140449	0	3.21439	0	0.41072	1.51837	0	0.832068	0	0	0	1.529	0.275585	0	3.04206	0	2.06954	0	0	0	0	0	0	0	0	0.135135	0	0	0	0
14	0	0	0.154321	0	0	0.154321	0	0	0.154321	3.0587	0	0.308642	0.612664	0.617284	0.149701	0	0.299401	3.6344	0.154321	1.38889	0.753123	4.09274	0	0.299401	0.458343	0	1.51549	0.149701	0.304022	4.2332	0.154321	0.907444	0.458343	3.1853	0.149701	0.916685	0.304022	0	0	0	0	0	0	0	0	0	0	0	0
15	0	1.07914	0	0.179856	0	0.179856	0	0.359712	0	0.580926	0	0	0.13369	0	0.179856	0.26738	0	7.97715	0	0.806948	0	3.23741	0	0.359712	0.539568	0	0	0	0.179856	4.20979	0	0	0.13369	5.14081	0.313546	0.26738	0	0	0	0	0	0	0	0	0	0	0	0	0
16	0	0	0	0	0	0.731266	0	0	0	0	0	0	0	0	0.141643	0	0	3.98839	0	0.660778	0.778703	0.849858	1.27479	0	0	0	0.283286	0	0	0.566572	0	0.849858	1.43948	0.283286	0.424929	0	0	0	0	0	0	0	0	0	0	0	0	0	0
17	0	0.56338	0	0	0	0	0	0	0	0	0.629147	0	0	1.84059	0	0	0	0	0	0	0	0	0.516529	0	0	0.347457	0	0	0	0	0	0	0	0	0.798219	0	0	0	0	0	0	0	0	0	0	0	0.140845	0	0
18	0.314465	0.314465	0	0	0	0.628931	0	0.314465	0.119332	0.829693	0.276564	0	0.477327	1.25786	0	0	0	1.97948	0	0.157233	0.119332	0	0.949025	0	0	0	0	0	0	2.01175	0	0.314465	0.829693	0.395896	1.46425	0	0	0	0	0	0	0	0	0	0.157233	0	0	0	0
20	0	0.950119	0	0	0	0.475059	0	0	0.273224	0	0.356295	0	0	0.712589	0	0	0	0.255377	0	0	0	0	1.24119	0	0	0	0	0	0	0.273224	0	0	0	0	0.801825	0	0	0	0	0	0	0	0	0	0	0	0	0	0
21	0	0	0	0.561798	0	0.545449	0	0	0	0.421348	0	0	0	0	0	0	0	3.73491	0	0	0	0.958623	0.396825	0	0.132275	0	0.132275	0	0.132275	5.13272	0	0	0.661376	1.34727	0.529101	0.132275	0	0	0	0	0	0	0	0	0	0	0	0	0
22	0	0	0	0	0	0	0	0	0	0.268097	0.124069	0	0	0	0	0	0	0.248139	0	0	0.134048	0	0.268097	0	0	0.928359	0	0	0	2.98332	0	0	0.630326	0	0.650284	0	0	0	0	0	0	0	0	0	0.248139	0	0	0	0
26	0	0	0	0	0	0	0	0	0	0.711085	0	0	0.706215	0	0	0.423729	0	0	0	0	0	3.55299	0	0	6.8308	0	0	0.567407	0.141243	0	0.282486	0	0	3.4361	0	0.284921	0.143678	0	0	0	0	0	0	0	0.426164	0	0	0	0
27	0	0	0	0	0	0	0	0	0	1.01563	0	0	0.920151	0	0	0.253807	0	0	0	0	0	5.58617	0	0	3.71324	0.126904	0	0.285634	0	0	0.253807	0.603094	0	6.22109	0	0.571267	0.253807	0	0	0	0	0	0	0	0.761421	0	0	0	0
28	0	0	0	0.928793	0	0	0	0.154799	0	0.149701	0	0	0.459298	0	0.464396	0.464396	0.149701	1.99199	0	0	0	10.9926	0	0.304499	1.5123	0.299401	0.149701	0.309598	0.4542	1.0734	0.459298	0.299401	0	6.53399	0	1.9716	0	0	0	0	0	0	0	0	0.154799	0	0	0	0
29	0	0.691803	0	0	0	0	0	0	0	0.263158	0	0	0.403214	2.06693	0	0.403214	0	0	0	0	0	0.403214	0.131579	0	0.280112	1.37513	0	0.280112	0	0.140056	0	0.131579	0	0.280112	0.140056	0	0.131579	0	0	0	0	0	0	0	0	0	0	0	0
30	0	0.125313	0	0	0	0	0	0	0	0.505729	0	0	0.631042	2.27354	0	0.252864	0	0.127551	0	0	0	0.763068	0	0	1.39187	0.503491	0	0.765306	0	0.255102	0	0.125313	0	1.90431	1.13006	0	0.127551	0	0	0	0	0	0	0	0	0	0	0	0
31	0	1.55844	0	0.25974	0	0	0	0.779221	0	0	0	0	0	2.56351	0	0	0	1.57233	0	0.314465	0.157233	0.314465	0	0	0.25974	0.12987	0	0.12987	0.314465	2.69338	0	0	0.38961	1.43551	0.38961	0	0	0	0	0	0	0	0	0	0	0	0	0	0
32	0.153374	0	0	0	0	0	0	0	0	0.153374	0	0.306748	0	0.153374	0	1.0696	0.26178	0.65445	0	0	0	0.875277	0	0	0.568529	0.284264	0.153374	0.153374	1.31292	1.35788	0	0.13089	0	4.79154	0	0.306748	0	0	0	0	0	0	0	0	0.65445	0	0	0	0
33	0	1.62203	0	0.268716	0	0	0	0.160256	0.10846	0.702556	0	0	0	3.31845	0	2.20153	0	0.320513	0	1.60256	0	2.14486	0.160256	0	0	0.754352	0	0.645892	0	1.56537	0	0.160256	0	1.28692	0	0	0	0	0	0	0	0	0	0	0	0	0	0	0
34	0	3.67426	0	0	0.126904	0	0	0.380711	0.126904	3.5533	0	0.380711	0.421031	9.2733	1.47064	0.421031	0.126904	0	0	0	1.38406	5.21366	0	0	0.715159	0.421031	0.461352	0	1.04961	0.253807	0	0.126904	0.922703	4.58508	0	0	0.167224	0	0	0	0	0	0	0	0	0	0	0	0
35	0	0	0	0.375	0	0	0	0	0	0	0	0	0.387597	0.775194	0	0.5	0	2.0126	0	0.193798	0	2.90698	0	0.443798	0.693798	1.16279	0.387597	0.5	0	4.70058	0	0	0	2.13178	0	0.512597	0	0	0	0	0	0	0	0	0	0	0	0	0
36	0.125	0	0	0	0	0	0	0	0	0.602707	0	0.125	0.125	0.727707	0.25	1.20541	0.125	2.21736	0	0	0	3.38854	0	0.125	0.125	0.443471	0.5	1.13694	0.784236	4.54777	0	0	0	5.54777	0	1.03424	0	0	0	0	0	0	0	0	0	0	0	0	0
37	0	0.961538	0	0	0	0	0	0.415178	0	0.721154	0.120192	0	0.240385	2.16878	0.120192	0.267685	0	0.267685	0	0.120192	0.120192	0.56267	0	0	0.56267	0.830355	0	0.147493	0	0.120192	0	0.147493	0	0.294985	0.294985	0	0.480769	0	0	0	0	0	0	0	0	0	0	0	0
38	0.319572	0.917431	0	0.152905	0	0	0	0	0	2.52905	0	0.30581	1.25076	0.152905	0.152905	2.25076	0	0.166667	0.166667	0.30581	0.458716	11.4358	0	0.958716	0.152905	0.333333	0	0.625382	0	0.666667	0.333333	0.792049	0.166667	5.6682	0.166667	2.737	0	0	0	0	0	0	0	0	0.5	0	0	0	0
39	0	0	0	0	0	0	0	0	0	1.35593	0	0	0.292342	0	1.01695	0.338983	0	0	0.2457	0.12285	0	6.30409	0	0.4914	2.84721	0	0.292342	0.461833	0	0	0.923666	0.36855	0.169492	7.01162	0	2.29209	0	0	0	0	0	0	0	0	0.338983	0	0	0	0
40	0	0	0	0	0	0	0	0.491803	0	0.543386	0	0.107759	0.435627	0	0	0.379452	0.327869	0	0.810486	0.707321	0	7.24633	0	0.927431	1.13836	0.163934	0	1.19912	0	0	2.06119	0.107759	0	4.1132	0	1.73792	0	0	0	0	0	0	0	0	0.435627	0	0	0	0
41	0.13089	0	0	0.238095	0	0	0	0	0	0.630765	0	0.249938	0.65445	0.618923	0.78534	0.47619	0	0	0	0	0	1.85677	0	0	1.3089	0.119048	0.26178	0.357143	0	0	0.607081	0.368985	0	3.21366	0	1.5713	0	0	0	0	0	0	0	0	0.52356	0	0	0	0
42	0	0	0	0	0	0	0	0	0	0.43806	0	0	0	1.93003	0	0	0	0.31746	0	0.59679	0.15873	0.87612	0	0	0.298395	0.27933	0	1.63164	1.11111	2.52682	0	1.01578	0.15873	4.17753	0.418994	0.47619	0.15873	0	0	0	0	0	0	0	0.634921	0	0	0	0
43	0.317594	0.145773	0	0.171821	0.291545	0.807009	0	1.16618	0.145773	0.463366	0	0	0	0.145773	0	0	0.145773	1.75979	0	0.291545	0.291545	0	0.437318	0	0.145773	0	0	0.952782	0.609139	2.46261	0	0.463366	0.78096	1.1767	1.04646	0	0	0	0	0	0	0	0	0.171821	2.46261	0.171821	0.171821	0.317594	0
44	0	0	0	0	0.332501	0.479129	0	0.146628	0	1.076	0	0	0	0	0	0	0	3.34354	0	0.146628	0.479129	0.958257	0.146628	0	0.665002	0	0.557621	1.55512	1.90616	5.30149	0	0.743494	0.439883	5.02676	0.850876	0.81163	0.146628	0	0	0	0	0	0	0	0	0	0	0	0
45	0	0	0	0.460829	0	0	0	0	0	1.48515	0	0	0	0	0.460829	0.725464	0	2.20757	0	0	0.460829	2.5376	0	0.395431	0.460829	0.330033	0.395431	1.35131	9.68959	6.55731	0	3.79234	0	12.2956	0.230415	3.69272	0	0	0	0	0	0	0	0.165017	0	0	0	0.165017	0
5	0.301205	0.301205	0	0.150602	0	0.150602	0	3.97992	0	2.40964	0	0	0.166667	0.317269	3.58635	0.150602	0.166667	5.80723	0	2.31727	0.634538	9.95382	0	0.301205	0.317269	0	1.13454	0.753012	0	3.52209	0.150602	0.166667	0.166667	4.68876	0	1.23695	0	0	0	0	0	0	0	0	0	0	0	0	0
50	0	0	0	0	0	0	0	0	0	0	0	0	1.67863	0	0	0	0.2849	4.89244	0	0.14245	0.174216	1.09245	0	0.633332	0.14245	0	0	0	0.2849	1.86823	0	0.316666	0.348432	0.348432	0.601566	0	0	0	0	0	0	0	0	0.14245	1.69402	0	0.2849	0	0
51	0.16129	0	0	1.29032	1.77419	1.45161	0	1.45161	0.322581	0.322581	0	0.16129	0.322581	0.322581	0	0.645161	0	2.25806	0	0.645161	0	0.483871	0.322581	0.16129	0.483871	0	0.16129	2.25806	0	1.29032	0	0.967742	0.806452	5.64516	0	0	0	0	0	0	0	0	0	0	0	0	0	0	0
52	0	0.445104	0	0	0	0	0	0	0	0.890208	0	0	0.296736	0.593472	0	3.10133	0.74184	1.03203	0	0	0	3.69218	0	0	1.47452	0.445104	0	2.79935	0.148368	3.09871	0	0.589544	0	5.16931	0	0.883662	0.148368	0	0	0	0	0	0	0	0	0	0	0	0
53	0	0.263852	0.152439	0	0	0.457317	0	0	0.152439	0.152439	0	0	0	0	0.263852	0	0	0.416291	0	2.01992	0.152439	0.395778	0.284365	0	0	0	0.131926	0	0	0	0	0.263852	1.00553	0.131926	1.49221	0	0	0	0	0	0	0	0	0	1.06707	0	0	0	0
54	0	0	0	0.350467	0.116822	7.06345	0	1.08793	0	1.67204	0.116822	0	0	0	0	0	0	0.909768	0	0.823615	0	0	0.584112	0	0	0	0.116822	0	0	0.614782	0	0	0	0	0.817757	0	0	0	0	0	0	0	0	0	0	0	0	0	0
55	0	0.694444	0	0	0	0.138889	0	0	0.138889	0.289039	0	0	0.138889	3.06306	0	2.0458	0	0.694444	0	0	0	3.17943	0	0	2.05706	0	0.416667	1.28378	0	1.92943	0	0.15015	0.416667	4.15165	0	0.555556	0	0	0	0	0	0	0	0	0.138889	0	0	0	0
56	0	0	0	0	0	0	0	0	0	0.618555	0	0.160772	0.27248	0	0	0	0	0	1.69489	0.13624	0	6.95392	0	0.779327	0.544959	0	0.13624	0.433251	0	0	1.9919	0.408719	0	4.86389	0	2.83388	0	0	0	0	0	0	0	0	0	0	0	0	0
57	0	0	0	0	0	0	0	0	0	0.442478	0	0	0	0.15528	0	0	0.621118	0	0	0	0	4.15315	0	0	3.27599	0	0.310559	0.442478	0.15528	0	1.98749	0	0	3.80412	0	0.147493	0	0	0	0	0	0	0	0	0.776398	0	0	0	0
58	1.0101	1.13636	0.126263	0.126263	0	0	0	0	0	0	0	0	0.505051	0	0.25974	0	0	0	0.12987	0	0	0.649351	0	0	1.40332	0	0	0	0	0	0.252525	0	0	1.78932	0	0.512266	0	0	0	0	0	0	0	0	0.515873	0	0	0	0
59	0	0.214592	0	0	0	0	0	0	0	0.214592	0	0	0.214592	0.107296	0	0.214592	0	0	0.182482	0	0	2.53282	0	0	1.481	0	0.729927	0.826259	0	0	0.182482	0.182482	0	3.26274	0	1.41678	0.107296	0	0	0	0	0	0	0	0.912409	0	0.107296	0	0
60	0	0	0	0	0	0	0	0.15015	0	0.45045	0	0	0	0	0.611621	0.3003	0	0	0	0	0	2.12414	0	0	1.50701	0.30581	1.22049	2.12414	0	0	0.3003	0.3003	0	1.82109	0.152905	1.52079	0	0	0	0	0	0	0	0	0.152905	0	0	0	0
61	0.277008	0.692521	0	0.424501	0	0	0	0	0	2.13149	0	0	0.849002	0.884956	0	2.57397	0.138504	0.294985	0.415512	2.30595	0	5.1839	0	0	1.29148	0.147493	0.442478	1.76092	1.39403	1.44796	0.138504	2.30595	0	3.91039	0	1.12601	0	0	0	0	0	0	0	0	0.138504	0	0	0	0
63	0.437318	0.145773	0	0	0	0	0	0	0	0.439913	0	0	0.291545	0	0	2.04082	0	0	0	0	0	6.31234	0	0.296736	2.19957	0	0	1.91581	0	0	0.439913	0.145773	0.145773	3.69363	0	0.439913	0.145773	0	0	0	0	0	0	0	0	0	0	0	0
64	0	0	0	0	0	0	0	0	0	0	0	0	1.40822	0	0	0	0	0	0	0.13089	0	1.1517	0	0.13089	0.649188	0.13089	0	0.13089	0	0	0	0.78534	0	2.06267	0	0.513036	0	0	0	0	0	0	0	0	0.125628	0	0	0	0
68	0	0	0	0	0	0.352113	0	0	0.143678	1.00575	0	0	0	0	0.528169	0.783147	0	0.143678	0	0.671847	0	6.07496	0	0.607091	1.23239	0.352113	0.528169	0.463413	0.352113	1.61284	0.991582	0.847904	0.319734	6.79335	0.176056	1.37607	0	0	0	0	0	0	0	0	0.176056	0	0	0	0
69	0	0	0	0	0	0.675676	0	0.816327	0	0.204082	0	0	0	0.405405	1.69884	0.948704	1.15554	3.52454	0	1.01765	2.31109	3.67347	0	0.816327	0	0	0.408163	0.27027	0.678434	2.23387	0	0.135135	1.22173	1.90292	0	0.951462	0	0	0	0	0	0	0	0	0.27027	0	0	0	0
7	0.18797	0	0	0	0	0	0	0.140845	0.18797	0.84507	0	0.28169	0.46966	0	0.18797	0	0	0	0.516785	0	0.140845	1.50376	0	1.5027	0.986445	0	0.65763	0	0	0	0.8456	0	0	5.02595	0	2.06661	0	0	0	0	0	0	0	0	0.18797	0	0	0	0
70	0	0	0	0.146628	0.293255	0.146628	0	0.879765	0	0.293255	0	0.146628	0	0	0	0	0.573931	1.14786	0	0.414724	0.146628	1.14786	0.439883	0	0	0.548772	0	0.829448	0.682821	3.2718	0	0.268097	0.573931	5.41657	0	1.00123	0	0	0	0	0	0	0	0	0	0	0	0	0
9	0	0	0	0	0	0	0.122549	0	0	0.520086	0	0	0.579866	0	0.122549	0	0	0	0.245098	0.122549	0	4.1846	0	0.152439	1.58716	0	0.427427	0	0	0	0.824964	0.520086	0	4.19058	0	2.1999	0	0	0	0	0	0	0	0	0.274988	0	0	0	0
100	0.160772	0	0	0	0	0	0	0	0	0	0	0	0.815222	0	0.321543	0.422552	0	0	0.52356	0.52356	0	3.08875	0	0.26178	2.72596	0	2.77436	1.06564	0	0	1.48819	1.13677	0	4.21415	0	1.13677	0.160772	0	0	0	0	0	0	0	0	0	0	0	0
1100	0.319518	0.158228	0	0	0	0	0	0	0	1.26889	0	0.16129	1.27501	0	0	0.480808	0	0.319518	0.158228	0.316456	0.319518	6.70376	0.16129	0.791139	1.76501	0	0	1.28114	0	0.639036	0.158228	0.474684	0	5.92793	0.322581	1.12291	0.319518	0	0	0	0	0	0	0	0	0	0	0	0
1200	0	0.649351	0	0.455927	0	0	0	0	0	0	0	0	0.151976	0	0	0	0.162338	0	0	0.455927	0.151976	3.2433	0	0.151976	2.33145	0.487013	1.24689	1.23653	0.151976	1.88588	0	5.73708	0.151976	3.2433	0.151976	2.37289	0	0	0	0	0	0	0	0	0	0	0	0	0
1300	0	0.152439	0	0.289802	0	0	0	0	0	0	0	0	0	0.289802	0.152439	0.747119	0	0.152439	0	0	0	2.18105	0	0	0.137363	0.304878	0.274725	1.00677	0	2.01354	0	0.289802	0	4.02707	0.289802	0.152439	0	0	0	0	0	0	0	0	0	0	0	0	0
200	0.16129	0	0	0.16129	0	0	0	0.15625	0	0	0	0	0	0	0.322581	1.11391	0	0.16129	0.791331	1.26008	0	3.03931	0	0.63004	2.37903	0	0.63004	0.640121	0	0	1.42137	0.645161	0	4.25907	0	0.78125	0.31754	0	0	0	0	0	0	0	0.322581	0	0	0	0
400	0.835534	0	0.194553	2.08333	0	0	0	0	0.194553	2.4267	0	0	0.492172	0.194553	0.537915	1.568	0	1.28196	0	1.08741	0.14881	3.59401	0	0.14881	2.15166	0.389105	1.61374	1.41919	0.389105	1.85404	0.389105	3.09026	0	6.5922	0	0	0.583658	0	0	0	0	0	0	0.389105	0	0	0	0	0
500	0	0	0.771605	0.30676	0	0	0	0	0	0.771605	0	0	0	0	0.154321	0.61352	0	0.771605	0	0.308642	0	0.30676	0	0.611638	0	0.152439	2.29223	1.99112	0	3.05443	0	1.22139	0	2.15108	0.609756	0.611638	0	0	0	0	0	0	0	0	0	0	0	0	0
700	0	0	0	0	0	0.14881	0	0.14881	0	0	0	0.14881	0	0.744048	0	0.883746	0	1.31499	0	0	0	0.145773	0	0	0	0	1.33321	0.294582	0	2.04689	0	0.297619	0	0.145773	0.14881	0	0	0	0	0	0	0	0	0	0	0	0.14881	0	0
900	0	0	0	0	0	0	0	0	0	0	0	0	0.294118	0.147059	0	0	0	0.735294	0	0.294118	0	0.294118	0	0.147059	0.441176	0	0.293686	2.05451	0	3.52208	0	3.52165	0	3.23055	0.146628	1.32094	0	0	0	0	0	0	0	0	0	0	0	0	0
[truncated: 23 more columns]

## Sheet: Groupers
	Density (per 100 m x 5m)
	C. argus	P. leopardus	E. ongus	E. miniata	C. urodeta	V. louti	V. arbimarginata	C. argus	P. leopardus	E. ongus	E. miniata	C. urodeta	V. louti	V. arbimarginata	C. argus	P. leopardus	E. ongus	E. miniata	C. urodeta	V. louti	V. arbimarginata	C. argus	P. leopardus	E. ongus	E. miniata	C. urodeta	V. louti	V. arbimarginata	C. argus	P. leopardus	E. ongus	E. miniata	C. urodeta	V. louti	V. arbimarginata
Site	Size class 1	Size class 1	Size class 1	Size class 1	Size class 1	Size class 1	Size class 1	Size class 2	Size class 2	Size class 2	Size class 2	Size class 2	Size class 2	Size class 2	Size class 3	Size class 3	Size class 3	Size class 3	Size class 3	Size class 3	Size class 3	Size class 4	Size class 4	Size class 4	Size class 4	Size class 4	Size class 4	Size class 4	Size class 5	Size class 5	Size class 5	Size class 5	Size class 5	Size class 5	Size class 5
1	0	0	0	0	0	0	0	0	0.153374	0	0	0	0	0	0	0.295824	0.14245	0	0	0	0	0	0.306748	0	0	0	0	0	0	0	0	0	0	0	0
11	0	0	0	0	0	0	0	0	0	0	0	0.402145	0	0	0	0	0	0	0	0	0	0	0	0	0	0	0	0	0	0	0	0	0	0	0
13	0	0	0	0	0	0	0	0	0	0	0	0.140449	0	0	0	0.145773	0	0	0	0	0	0	0	0	0	0	0	0	0	0	0	0	0	0	0
14	0	0	0	0	0	0	0	0	0	0	0	0	0	0	0	0.149701	0	0	0	0	0	0	0	0	0	0	0	0	0	0	0	0	0	0	0
15	0	0	0	0	0	0	0	0	0.13369	0	0	0	0	0	0	0	0	0	0	0	0	0	0	0	0	0	0	0	0	0	0	0	0	0	0
16	0	0	0	0	0	0	0	0	0	0	0	0	0	0	0	0	0.353774	0	0	0	0	0	0	0	0	0	0	0	0	0	0	0	0	0	0
17	0	0	0	0	0	0	0	0	0	0	0	0	0	0	0	0	0	0	0	0	0	0	0	0	0	0	0	0	0	0	0	0	0	0	0
18	0	0	0	0	0	0	0	0	0	0	0	0	0	0	0	0	0	0	0	0	0	0	0.157233	0	0	0	0	0	0	0	0	0	0	0	0
20	0	0	0	0	0	0	0	0	0	0	0	0	0	0	0	0	0.136612	0	0	0	0	0	0	0	0	0	0	0	0	0	0	0	0	0	0
21	0	0	0	0	0	0	0	0	0.140449	0	0	0	0	0	0	0.140449	0	0	0	0	0	0	0.140449	0	0	0	0	0	0	0	0	0	0	0	0
22	0	0	0	0	0	0	0	0	0.134048	0	0	0	0	0	0	0	0.268097	0.124069	0	0	0	0	0	0	0	0	0	0	0	0	0	0	0	0	0
26	0	0	0	0	0.141243	0	0	0	0	0	0	0.141243	0	0	0	0	0	0	0	0.141243	0	0	0	0	0	0	0	0	0	0	0	0	0	0	0
27	0	0	0	0	0	0	0	0	0	0	0	0.373209	0.126904	0.126904	0	0	0	0	0	0.126904	0	0	0	0	0	0	0	0	0	0	0	0	0	0	0
28	0	0	0	0	0	0	0	0	0	0	0	0.285689	0.309598	0.154799	0.285689	0	0	0	0	0	0	0	0	0	0	0	0.13089	0	0	0	0	0	0	0	0
29	0	0	0	0	0	0	0	0	0	0	0	0	0	0	0	0	0	0	0	0	0	0	0	0	0	0	0	0	0	0	0	0	0	0	0
30	0	0	0	0	0	0	0	0	0	0	0	0	0	0.127551	0	0	0	0	0	0	0	0	0	0	0	0	0	0	0	0	0	0	0	0	0
31	0	0	0	0	0	0	0	0	0	0	0	0	0	0	0	0	0	0	0	0	0	0	0	0	0	0	0	0	0	0	0	0	0	0	0
32	0	0	0	0	0	0	0	0	0	0	0	0	0.13089	0	0	0	0	0	0.306748	0.13089	0	0	0	0	0	0	0.13089	0	0	0	0	0	0	0	0
33	0	0	0	0	0	0	0	0	0	0	0	0	0.21692	0	0	0	0.160256	0	0	0	0	0	0	0	0	0	0	0	0	0	0	0	0	0	0
34	0	0	0	0	0	0	0	0	0	0	0	0	0	0	0	0	0	0	0	0.461352	0	0	0	0	0	0	0	0	0	0	0	0	0	0	0
35	0	0	0	0	0	0	0	0	0	0	0	0.387597	0	0	0.193798	0	0	0.193798	0.193798	0	0	0	0	0	0	0	0	0	0	0	0	0	0	0	0
36	0	0	0	0	0	0	0	0	0.25	0	0	0	0.132626	0	0	0.132626	0	0	0	0.25	0	0	0.132626	0	0	0	0	0	0	0	0	0	0	0	0
37	0	0	0	0	0	0	0	0	0	0	0	0	0.247743	0	0	0	0	0.382653	0	0.255102	0	0	0	0	0	0	0.127551	0	0	0	0	0	0	0	0
38	0	0	0	0	0	0	0	0	0	0	0	0.319572	0.486239	0	0	0	0	0	0	0	0	0	0	0	0	0	0	0	0	0	0	0	0	0	0
39	0	0	0	0	0	0	0	0.144928	0.12285	0	0	0	0	0	0.289855	0	0	0	0	0	0	0	0	0	0	0	0	0	0	0	0	0	0	0	0
40	0	0	0	0	0	0	0	0.107759	0.107759	0	0	0	0	0	0.263522	0	0	0	0	0	0	0	0	0	0	0	0	0	0	0	0	0	0	0	0
41	0	0	0	0	0.284091	0	0	0.119048	0	0	0	0.142045	0.119048	0	0.119048	0	0	0	0	0.119048	0	0	0	0	0	0	0	0	0	0	0	0	0	0	0
42	0	0	0	0	0	0	0	0	0.15873	0	0.15873	0	0	0	0	0	0.974026	0.324675	0	0.162338	0	0	0.15873	0	0.15873	0	0	0	0	0	0	0	0	0	0
43	0	0	0	0	0	0	0	0	0	0.291545	0	0	0	0	0	0	1.16618	0	0	0	0	0	0.145773	0	0	0	0	0	0	0.145773	0	0	0	0	0
44	0	0	0	0	0	0	0	0	0.146628	0	0.146628	0	0	0.146628	0	0	0	0.58651	0	0.185874	0.293255	0	0	0	0	0	0	0	0	0.185874	0	0	0	0	0
45	0	0	0	0	0	0	0	0	0	0	0	0	0	0	0	0.230415	0.460829	0	0	0	0	0	0.460829	0	0	0	0	0	0	0.230415	0	0	0	0	0
5	0	0	0	0	0	0	0	0	0.166667	0	0	0	0	0	0	0	0.150602	0	0	0	0	0	0.150602	0	0	0	0	0	0	0	0	0	0	0	0
50	0	0	0	0	0	0	0	0	0	0	0.348432	0	0	0.569801	0	0.601566	0	0.316666	0	0	0.2849	0	0.2849	0	0	0	0	0	0	0.14245	0	0	0	0	0
51	0	0	0	0	0	0.16129	0	0	0	0.322581	0	0	0	0	0	0.322581	0.16129	0.483871	0	0	0	0	0	0	0.16129	0	0	0	0	0	0	0	0	0	0
52	0	0	0	0	0	0	0	0	0	0	0	0	0.148368	0.148368	0	0	0	0	0	0.147059	0	0	0	0	0	0	0.147059	0	0	0	0	0	0	0	0
53	0	0	0	0	0	0	0	0	0.131926	0	0	0	0	0	0	0.284365	0.659631	0	0	0	0	0	0.131926	0	0	0	0	0	0	0	0	0	0	0	0
54	0	0	0	0	0	0	0	0	0	0	0	0	0	0	0	0.147493	0.116822	0	0	0	0	0	0	0	0	0	0	0	0	0	0	0	0	0	0
55	0	0	0	0	0	0	0	0	0	0	0	0	0	0	0.15015	0	0	0	0	0.138889	0	0	0	0	0	0	0	0	0	0	0	0	0	0	0
56	0	0	0	0	0.141243	0	0	0	0	0	0	0.141243	0.141243	0	0.423729	0	0	0	0	0	0	0	0	0	0	0	0	0	0	0	0	0	0	0	0
57	0	0	0	0	0	0	0	0	0	0	0	0.442478	0	0	0.302772	0	0	0	0	0	0.147493	0	0	0	0	0	0	0	0	0	0	0	0	0	0
58	0	0	0	0	0	0	0	0	0	0	0	0	0	0	0	0	0	0	0	0	0	0	0	0	0	0	0	0	0	0	0	0	0	0	0
59	0	0	0	0	0	0	0	0	0	0	0	0	0	0	0	0	0	0	0	0	0	0	0	0	0	0	0	0	0	0.182482	0	0	0	0	0
60	0	0	0	0	0	0	0	0	0	0	0	0.453205	0	0	0.455961	0	0	0	0	0.606111	0	0	0	0	0	0	0.152905	0	0	0	0	0	0	0	0
61	0	0	0	0	0	0.147493	0	0	0	0	0	0	0.138504	0.138504	0.294985	0	0	0	0	0.138504	0	0	0	0	0	0	0	0	0	0	0	0	0	0	0
63	0	0	0	0	0.145773	0	0	0	0	0	0	0.294141	0	0	0	0	0	0	0	0.437318	0	0	0	0	0	0	0	0	0	0	0	0	0	0	0
64	0	0	0	0	0	0	0	0.13089	0	0	0	0.13089	0.13089	0	0.125628	0	0	0	0	0	0	0	0	0	0	0	0	0	0	0	0	0	0	0	0
68	0	0	0	0	0	0	0	0	0	0	0	0	0.574713	0	0	0.143678	0	0	0	0.287356	0	0	0	0	0	0	0	0	0	0.143678	0	0	0	0	0
69	0	0	0	0	0	0	0	0	0.125	0	0	0	0	0	0	0.204082	0	0	0	0	0	0	0.125	0	0	0	0	0	0	0	0	0	0	0	0
7	0	0	0	0	0	0	0	0	0	0	0	0.328815	0.140845	0	0.18797	0	0	0	0.18797	0	0	0	0	0	0	0	0	0	0	0	0	0	0	0.18797	0
70	0	0	0	0	0	0.268097	0	0	0	0	0	0	0.293255	0	0	0.280676	0	0	0	0	0	0	0.134048	0	0	0	0	0	0	0	0	0	0	0	0
9	0	0	0	0	0	0	0	0	0	0	0	0	0	0	0	0.152439	0	0	0	0	0	0	0.152439	0	0	0	0	0	0	0	0	0	0	0	0
100	0	0	0	0	0	0	0	0	0	0	0	0.321543	0	0.13089	0.13089	0	0	0	0	0.321543	0.13089	0	0	0	0	0	0	0	0	0	0	0	0	0	0
1100	0	0	0	0	0.16129	0.158228	0	0	0.16129	0	0	0	0.16129	0	0	0.322581	0.158228	0	0	0.16129	0.319518	0	0.16129	0	0	0	0	0	0	0	0	0	0	0	0
1200	0	0	0	0	0	0.151976	0	0	0	0	0	0	0	0	0	0.476651	0.607903	0	0.314313	0.151976	0	0	0.162338	0	0	0	0	0	0	0	0	0	0	0	0
1300	0	0	0	0	0	0	0	0	0.152439	0	0	0	0.137363	0	0	0.137363	0	0	0	0	0	0	0	0	0	0	0	0	0	0	0	0	0	0	0
200	0	0	0	0	0	0	0	0	0	0	0	0.31754	0.16129	0	0	0.15625	0	0	0.15625	0.16129	0.16129	0	0.16129	0	0	0	0	0	0	0	0	0	0	0	0
400	0	0	0	0	0	0	0	0	0.14881	0	0	0.194553	0.14881	0	0	0.14881	0	0	0.194553	0	0.14881	0	0	0	0	0	0.14881	0	0	0.194553	0	0	0	0	0
500	0	0.154321	0	0	0	0	0	0	0.308642	0	0	0.152439	0.459199	0	0	1.0746	0.462963	0.154321	0	0	0.154321	0	0	0	0	0	0	0	0	0.152439	0	0	0	0	0
700	0	0	0	0	0	0.14881	0	0	0.145773	0.145773	0	0	0.592201	0	0	0	0.589164	0	0	0	0	0	0	0	0	0	0	0	0	0	0	0	0	0	0
900	0	0	0	0	0	0.146628	0	0	0.441176	0.147059	0	0	0.147059	0	0	0.440314	0	0.147059	0	0.147059	0	0	0.294118	0	0	0	0	0	0	0	0	0	0	0	0
